# Supplementary material for: Biosensor immunoassay for traces of hazelnut protein in olive oil
Source: PubMed Central journal article supplement — Anal Bioanal Chem. 2009 Mar 5;395(1):119–26. doi: 10.1007/s00216-009-2720-1 (PMC2724632; doi:10.1007/s00216-009-2720-1), 2009-03-05
Supplement: 216_2009_2720_MOESM1_ESM.pdf [file 216_2009_2720_MOESM1_ESM.pdf]

**Electronic annex: Sensitivities and specificities of developed anti hazelnut antibodies.**

**Table 1.** Sensitivity and specificity of developed anti hazelnut monoclonal antibodies as obtained with inhibition ELISA.

| Monoclonal antibody | Final dilution supernatant hybridoma | Working range (ppm) | 50% inhibition concentration (ppm) | Cross-reaction                              |
|---------------------|--------------------------------------|---------------------|------------------------------------|---------------------------------------------|
| 48-9F1              | 17500                                | 0.01-5              | 0.5                                | pecan,brazil, cashew, pistachio,rolled oats |
| 45-2E11             | 2000                                 | 1-100               | 5                                  | poppy seed                                  |
| 45-4G2              | 2000                                 | 0.5-100             | 5                                  | walnut                                      |
| 48-3B1              | 1500                                 | 0.5-100             | 6                                  | -                                           |
| 48-10F3             | 2500                                 | 0.5-100             | 6                                  | -                                           |
| 45-7B3              | 4000                                 | 1-100               | 10                                 | -                                           |
| 48-8G1              | 150                                  | 1-100               | 15                                 | -                                           |
| 45-6G4              | 100                                  | 10-2000             | 80                                 | -                                           |
| 48-3E10             | 2                                    | -                   | -                                  | not tested, insufficient final dilution     |
| 48-10F7             | 2                                    | -                   | -                                  | not tested, insufficient final dilution     |
| 50-6B3              | 1500                                 | 0.1-10              | 0.5                                | walnut                                      |
| 50-8B11             | 15000                                | 1-100               | 4                                  | cashew                                      |
| 50-1G2              | 10000                                | 1-100               | 5                                  | -                                           |
| 50-6E1              | 25000                                | 1-100               | 5                                  | -                                           |
| 50-4F2              | 16000                                | 0.1-100             | 6                                  | -                                           |
| 50-6B12             | 20000                                | 0.1-100             | 6                                  | -                                           |
| 50-8A3              | 30000                                | 1-100               | 6                                  | -                                           |
| 50-7B8              | 6000                                 | 1-50                | 6                                  | walnut                                      |
| 50-5H9              | 20000                                | 1-100               | 5                                  | -                                           |
| 50-1G10             | 1000                                 | 5-100               | 50                                 | pecan                                       |
| 50-2D9              | 750                                  | 10-100              | 50                                 | many                                        |
| 50-3A11             | 1500                                 | 5-100               | 70                                 | many                                        |
| 50-6G7              | 60                                   | 10-100              | 100                                | not tested, insufficient final dilution     |

**Table 2.** Sensitivity and specificity of developed anti hazelnut polyclonal antibodies as obtained with inhibition ELISA.

| Polyclonal antibody | Final dilution serum | Working range (ppm) | 50% inhibition concentration (ppm) | Cross-reaction                  |
|---------------------|----------------------|---------------------|------------------------------------|---------------------------------|
| MH 25 (rabbit)      | 5000                 | 0.1-10              | 0.5                                | Walnut, cashew                  |
| MH 5 (sheep)        | 3000                 | 0.1-10              | 0.5                                | Pecan, walnut, cashew           |
| MH6 (sheep)         | 3000                 | 0.1-10              | 0.5                                | Pecan, walnut, cashew, chickpea |
